# Supplementary material
Source: Springer Nature journal article supplement (https://www.springermedizin.de/resource/supplementary/12882_2014_782_MOESM9_ESM.pdf/9454702)
Supplement: MOESM9 [file 9454702]

**Table 3**

| Group                     | A       | B       | C1                   | C2                   | D                                 |
|---------------------------|---------|---------|----------------------|----------------------|-----------------------------------|
| Speculated Immune complex | IgA-IgG | IgA-IgG | Self-aggregated pIgA | Self-aggregated pIgA | Self-aggregated mIgA<br>mIgA-mIgA |
| Complements               | ↓       | ↓       | ↓                    | ↓                    | →                                 |
| Remarks                   |         |         |                      | Early phase ?        |                                   |
